# Supplementary material for: Adipose tissue dysfunction is associated with low levels of the novel Palmitic Acid Hydroxystearic Acids
Source: PubMed Central journal article supplement (PMC6202399; doi:10.1038/s41598-018-34113-3), 2018-10-25
Supplement: 41598_2018_34113_MOESM1_ESM.pdf [file 41598_2018_34113_MOESM1_ESM.pdf]

# **Adipose tissue dysfunction is associated with low levels of the novel Palmitic Acid Hydroxystearic Acids**

Ann Hammarstedt<sup>1\*</sup>, Ismail Syed<sup>2</sup>, Archana Vijayakumar<sup>2</sup>, Björn Eliasson<sup>1</sup>, Silvia Gogg<sup>1</sup>,  
Barbara B. Kahn<sup>2</sup> and Ulf Smith<sup>1</sup>

<sup>1</sup>The Lundberg Laboratory for Diabetes Research, Departments of Molecular and Clinical Medicine, Institute of Medicine, Sahlgrenska Academy at the University of Gothenburg, Gothenburg, Sweden. <sup>2</sup>Department of Medicine, Beth Israel Deaconess and Harvard Medical School, Boston, Massachusetts, USA.

\*Corresponding author:

Ann Hammarstedt, PhD

The Lundberg Laboratory for Diabetes Research

Blå Stråket 5, Sahlgrenska University Hospital

413 45 Göteborg

Sweden

E-mail: [Ann.hammarstedt@medic.gu.se](mailto:Ann.hammarstedt@medic.gu.se)

Phone: +46-31 342 6646

**Supplemental table 1. Partial correlations controlling for adipocyte cell size**

| <i>Gene vs GLUT4</i>  | <i>R<sub>p</sub></i> | <i>p-value</i> |
|-----------------------|----------------------|----------------|
| PPAR $\gamma$         | 0.50                 | 0.001          |
| C/EBP $\alpha$        | 0.48                 | 0.001          |
| Adiponectin           | 0.75                 | <0.001         |
| ChREBP                | 0.32                 | 0.034          |
| ACACA                 | 0.75                 | <0.001         |
| FASN                  | 0.65                 | <0.001         |
| <i>PAHSA vs GLUT4</i> | <i>R<sub>p</sub></i> | <i>p-value</i> |
| Total-PAHSA           | 0.67                 | 0.024          |
| 5-PAHSA               | 0.18                 | 0.61           |
| 9-PAHSA               | 0.63                 | 0.039          |
| 10-PAHSA              | 0.54                 | 0.087          |
| 12/13-PAHSA           | 0.61                 | 0.049          |

# Full length captures

Full length membranes to Figure 3A

Some of the original membranes have been cut to enable blotting of multiple proteins at different molecular size.

The original tiff-files from caputre is full length.

Figure 3A GLUT4 protein

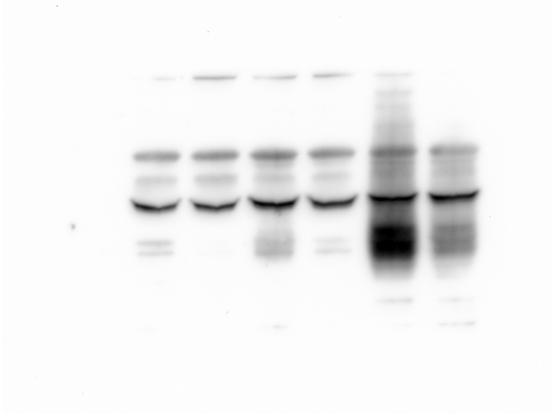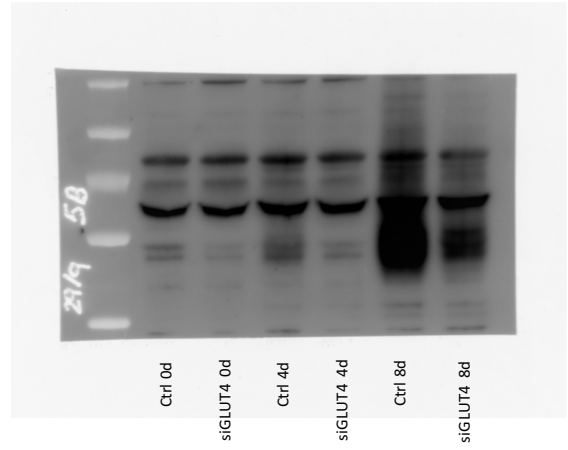

Full length membranes to Figure 3C

FABP4 protein

Some of the original membranes have been cut to enable blotting of multiple proteins at different molecular size.

The original tiff-files from caputre is full size.

Two independent experiments have been visualized at the same time -> both are on the original TIFF-file

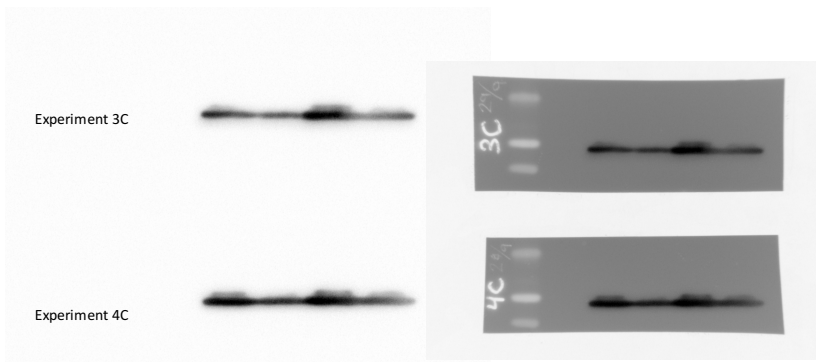

All quantified blots

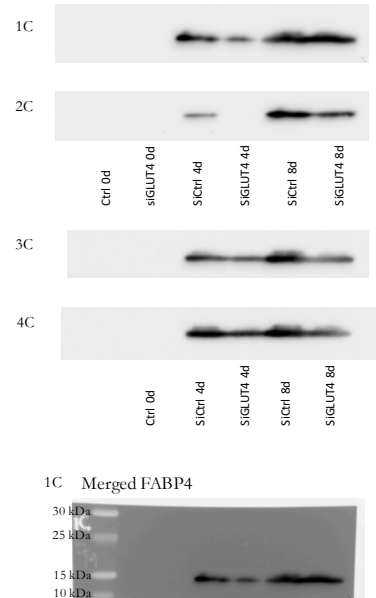

1.C, 2.C, 3C, 4C FABP4 #3544 1:1000 rabbit  
NuPage 4-12%, 1mm, MOPS, BioRad transfer 30 min

Full length membranes to Figure 3C  
Perilipin protein

Some of the original membranes have been cut to enable blotting of multiple proteins at different molecular size.  
The original tiff-files from caputre is full length.

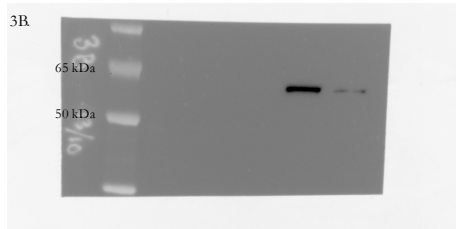

All quantified blots

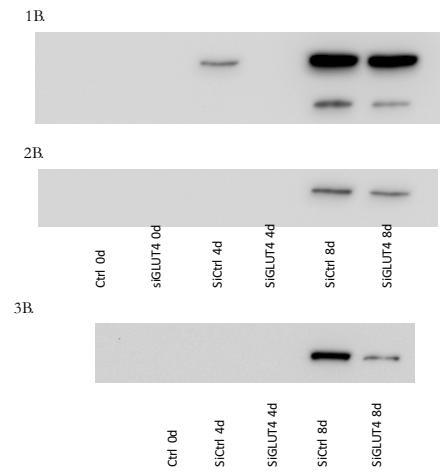

1.B och 2.B Perilipin #9349s 1:1000 rabbit  
NuPage 4-12%, 1mm, MOPS, BioRad transfer 30 min
